# Supplementary material for: A Hybrid Indoor Positioning System Based on Visible Light Communication and Bluetooth RSS Trilateration
Source: MDPI journal article supplement (doi:10.3390/s23167199), 2023-08-16
Supplement: s1 [file s1]

# First Experiment

## First LED

| #  | LED #0x270f     | D4 value | Error |      |        |
|----|-----------------|----------|-------|------|--------|
|    | Actual position |          | VLC   | BLE  | Hybrid |
| 1  | 0.9, 1.5        | 0.42     | 0.36  | 0.13 | 0.13   |
| 2  | 0.9, 1.7        | 0.19     | 0.30  | 0.15 | 0.15   |
| 3  | 0.9, 1.9        | 0.19     | 0.36  | 0.31 | 0.31   |
| 4  | 1.0, 1.5        | 0.25     | 0.46  | 0.06 | 0.06   |
| 5  | 1.0, 1.7        | 0.11     | 0.20  | 0.09 | 0.08   |
| 6  | 1.0, 1.9        | 0.20     | 0.28  | 0.09 | 0.09   |
| 7  | 1.1, 1.3        | 0.36     | 0.41  | 0.12 | 0.12   |
| 8  | 1.1, 1.5        | 0.09     | 0.22  | 0.15 | 0.19   |
| 9  | 1.1, 1.7        | 0.12     | 0.10  | 0.18 | 0.16   |
| 10 | 1.1, 1.9        | 0.36     | 0.22  | 0.15 | 0.15   |
| 11 | 1.1, 2.1        | 0.18     | 0.41  | 0.23 | 0.23   |
| 12 | 1.2, 1.3        | 0.45     | 0.40  | 0.09 | 0.09   |
| 13 | 1.2, 1.5        | 0.25     | 0.20  | 0.22 | 0.22   |
| 14 | 1.2, 1.9        | 0.23     | 0.23  | 0.20 | 0.20   |
| 15 | 1.2, 2.1        | 0.58     | 0.40  | 0.41 | 0.41   |
| 16 | 1.3, 1.3        | 0.39     | 0.41  | 0.04 | 0.04   |
| 17 | 1.3, 1.5        | 0.23     | 0.22  | 0.13 | 0.13   |
| 18 | 1.3, 1.7        | 0.29     | 0.10  | 0.19 | 0.19   |
| 19 | 1.3, 1.9        | 0.32     | 0.22  | 0.14 | 0.14   |
| 20 | 1.3, 2.1        | 0.45     | 0.41  | 0.24 | 0.24   |
| 21 | 1.4, 1.5        | 0.26     | 0.28  | 0.04 | 0.04   |
| 22 | 1.4, 1.7        | 0.27     | 0.20  | 0.09 | 0.09   |
| 23 | 1.4, 1.9        | 0.45     | 0.28  | 0.22 | 0.22   |
| 24 | 1.5, 1.5        | 0.45     | 0.36  | 0.10 | 0.10   |
| 25 | 1.5, 1.7        | 0.24     | 0.30  | 0.11 | 0.11   |
| 26 | 1.5, 1.9        | 0.47     | 0.36  | 0.11 | 0.11   |

## Second LED

| # | LED #0xa7d5 | D4 value | Error |
|---|-------------|----------|-------|
|---|-------------|----------|-------|

|    | Actual Position |      | VLC  | BLE  | Hybrid |
|----|-----------------|------|------|------|--------|
| 1  | 2.2, 1.5        | 0.44 | 0.36 | 0.10 | 0.10   |
| 2  | 2.2, 1.7        | 0.41 | 0.30 | 0.19 | 0.19   |
| 3  | 2.2, 1.9        | 0.48 | 0.36 | 0.12 | 0.12   |
| 4  | 2.3, 1.5        | 0.34 | 0.28 | 0.11 | 0.11   |
| 5  | 2.3, 1.7        | 0.27 | 0.20 | 0.15 | 0.15   |
| 6  | 2.3, 1.9        | 0.35 | 0.28 | 0.06 | 0.06   |
| 7  | 2.4, 1.3        | 0.51 | 0.41 | 0.14 | 0.14   |
| 8  | 2.4, 1.5        | 0.30 | 0.22 | 0.10 | 0.10   |
| 9  | 2.4, 1.7        | 0.12 | 0.10 | 0.03 | 0.03   |
| 10 | 2.4, 1.9        | 0.19 | 0.22 | 0.04 | 0.04   |
| 11 | 2.4, 2.1        | 0.21 | 0.41 | 0.21 | 0.21   |
| 12 | 2.5, 1.3        | 0.28 | 0.40 | 0.25 | 0.25   |
| 13 | 2.5, 1.5        | 0.31 | 0.20 | 0.13 | 0.13   |
| 14 | 2.5, 1.9        | 0.10 | 0.20 | 0.23 | 0.27   |
| 15 | 2.5, 2.1        | 0.44 | 0.40 | 0.04 | 0.04   |
| 16 | 2.6, 1.3        | 0.38 | 0.41 | 0.27 | 0.27   |
| 17 | 2.6, 1.5        | 0.06 | 0.22 | 0.24 | 0.23   |
| 18 | 2.6, 1.7        | 0.11 | 0.10 | 0.10 | 0.09   |
| 19 | 2.6, 1.9        | 0.13 | 0.22 | 0.15 | 0.16   |
| 20 | 2.6, 2.1        | 0.34 | 0.41 | 0.07 | 0.07   |
| 21 | 2.7, 1.5        | 0.27 | 0.28 | 0.18 | 0.18   |
| 22 | 2.7, 1.7        | 0.11 | 0.20 | 0.13 | 0.14   |
| 23 | 2.7, 1.9        | 0.31 | 0.28 | 0.09 | 0.09   |
| 24 | 2.8, 1.5        | 0.30 | 0.36 | 0.07 | 0.07   |
| 25 | 2.8, 1.7        | 0.30 | 0.30 | 0.17 | 0.17   |
| 26 | 2.8, 1.9        | 0.38 | 0.36 | 0.05 | 0.05   |

## SECOND EXPERIMNET

### First led

| # | LED #0x270f     | D4 value | Error |      |        |
|---|-----------------|----------|-------|------|--------|
|   | Actual Position |          | VLC   | BLE  | Hybrid |
| 1 | 1.9, 2.5        | 0.90     | 0.36  | 1.21 | 0.36   |

|    |          |      |      |      |      |
|----|----------|------|------|------|------|
| 2  | 1.9, 2.7 | 1.05 | 0.30 | 1.15 | 0.30 |
| 3  | 1.9, 2.9 | 1.16 | 0.36 | 1.10 | 0.36 |
| 4  | 2.0, 2.5 | 1.11 | 0.28 | 1.34 | 0.28 |
| 5  | 2.0, 2.7 | 1.13 | 0.20 | 1.19 | 0.20 |
| 6  | 2.0, 2.9 | 0.84 | 0.28 | 0.91 | 0.28 |
| 7  | 2.1, 2.3 | 0.98 | 0.41 | 1.37 | 0.41 |
| 8  | 2.1, 2.5 | 0.83 | 0.22 | 1.05 | 0.22 |
| 9  | 2.1, 2.7 | 1.14 | 0.10 | 1.18 | 0.10 |
| 10 | 2.1, 2.9 | 0.80 | 0.22 | 0.73 | 0.22 |
| 11 | 2.1, 3.1 | 0.96 | 0.41 | 0.88 | 0.41 |
| 12 | 2.2, 2.3 | 0.64 | 0.41 | 0.91 | 0.41 |
| 13 | 2.2, 2.5 | 1.17 | 0.20 | 1.31 | 0.20 |
| 14 | 2.2, 2.9 | 0.84 | 0.20 | 0.71 | 0.20 |
| 15 | 2.2, 3.1 | 1.09 | 0.40 | 0.96 | 0.40 |
| 16 | 2.3, 2.3 | 0.92 | 0.41 | 1.03 | 0.41 |
| 17 | 2.3, 2.5 | 0.70 | 0.22 | 0.71 | 0.22 |
| 18 | 2.3, 2.7 | 1.17 | 0.10 | 1.10 | 0.10 |
| 19 | 2.3, 2.9 | 1.20 | 0.22 | 0.97 | 0.22 |
| 20 | 2.3, 3.1 | 1.30 | 0.41 | 1.06 | 0.41 |
| 21 | 2.4, 2.5 | 1.00 | 0.28 | 1.03 | 0.28 |
| 22 | 2.4, 2.7 | 0.83 | 0.20 | 0.79 | 0.20 |
| 23 | 2.4, 2.9 | 1.34 | 0.28 | 1.07 | 0.28 |
| 24 | 2.5, 2.5 | 0.92 | 0.36 | 0.90 | 0.36 |
| 25 | 2.5, 2.7 | 1.19 | 0.30 | 1.09 | 0.30 |
| 26 | 2.5, 2.9 | 0.96 | 0.36 | 0.68 | 0.36 |

## Second LED

| # | LED #0xa7d5     | D4 value | Error |      |        |
|---|-----------------|----------|-------|------|--------|
|   | Actual Position |          | VLC   | BLE  | Hybrid |
| 1 | 4.2, 2.5        | 0.36     | 0.30  | 0.87 | 0.36   |
| 2 | 4.2, 2.7        | 0.30     | 0.36  | 0.40 | 0.30   |
| 3 | 4.2, 2.9        | 0.36     | 0.28  | 0.49 | 0.36   |
| 4 | 4.3, 2.5        | 0.28     | 0.20  | 0.22 | 0.19   |
| 5 | 4.3, 2.7        | 0.20     | 0.28  | 0.62 | 0.20   |
| 6 | 4.3, 2.9        | 0.28     | 0.41  | 0.32 | 0.28   |
| 7 | 4.4, 2.3        | 0.41     | 0.22  | 0.63 | 0.41   |

|    |          |      |      |      |      |
|----|----------|------|------|------|------|
| 8  | 4.4, 2.5 | 0.22 | 0.10 | 0.86 | 0.22 |
| 9  | 4.4, 2.7 | 0.10 | 0.22 | 0.51 | 0.10 |
| 10 | 4.4, 2.9 | 0.22 | 0.41 | 0.20 | 0.20 |
| 11 | 4.4, 3.1 | 0.41 | 0.40 | 0.83 | 0.41 |
| 12 | 4.5, 2.3 | 0.40 | 0.20 | 0.76 | 0.40 |
| 13 | 4.5, 2.5 | 0.20 | 0.20 | 0.56 | 0.52 |
| 14 | 4.5, 2.9 | 0.20 | 0.40 | 0.44 | 0.41 |
| 15 | 4.5, 3.1 | 0.40 | 0.41 | 1.03 | 0.40 |
| 16 | 4.6, 2.3 | 0.41 | 0.22 | 0.82 | 0.41 |
| 17 | 4.6, 2.5 | 0.22 | 0.10 | 0.89 | 0.22 |
| 18 | 4.6, 2.7 | 0.10 | 0.22 | 0.86 | 0.10 |
| 19 | 4.6, 2.9 | 0.22 | 0.41 | 0.90 | 0.22 |
| 20 | 4.6, 3.1 | 0.41 | 0.28 | 0.87 | 0.41 |
| 21 | 4.7, 2.5 | 0.28 | 0.20 | 1.07 | 0.28 |
| 22 | 4.7, 2.7 | 0.20 | 0.28 | 0.73 | 0.20 |
| 23 | 4.7, 2.9 | 0.28 | 0.36 | 0.67 | 0.28 |
| 24 | 4.8, 2.5 | 0.36 | 0.30 | 1.01 | 0.36 |
| 25 | 4.8, 2.7 | 0.30 | 0.36 | 1.08 | 0.30 |
| 26 | 4.8, 2.9 | 0.36 | 0.30 | 0.71 | 0.36 |
